# Supplementary material for: NatalieQ: A web server for protein-protein interaction network querying
Source: Springer Nature journal article supplement (doi:10.1186/1752-0509-8-40), 2014-01-01
Supplement: 12918_2013_1313_MOESM1_ESM.pdf [file 12918_2013_1313_MOESM1_ESM.pdf]

## Overview for Dme from String (topology)

| Run | $E_{\max}$ | Edge correctness | Sequence contribution |
|-----|------------|------------------|-----------------------|
| 1   | 0          | 1/17 = 0.0588235 | 0.0091093             |
| 2   | 1e-100     | 8/17 = 0.470588  | 0.00794499            |
| 3   | 1e-50      | 10/17 = 0.588235 | 0.00845966            |
| 4   | 1e-10      | 16/17 = 0.941176 | 0.00890019            |
| 5   | 1          | 17/17 = 1        | 0.011376              |
| 6   | 10         | 17/17 = 1        | 0.011376              |
| 7   | 100        | 17/17 = 1        | 0.011376              |
