# Supplementary material for: NatalieQ: A web server for protein-protein interaction network querying
Source: Springer Nature journal article supplement (doi:10.1186/1752-0509-8-40), 2014-01-01
Supplement: 12918_2013_1313_MOESM3_ESM.pdf [file 12918_2013_1313_MOESM3_ESM.pdf]

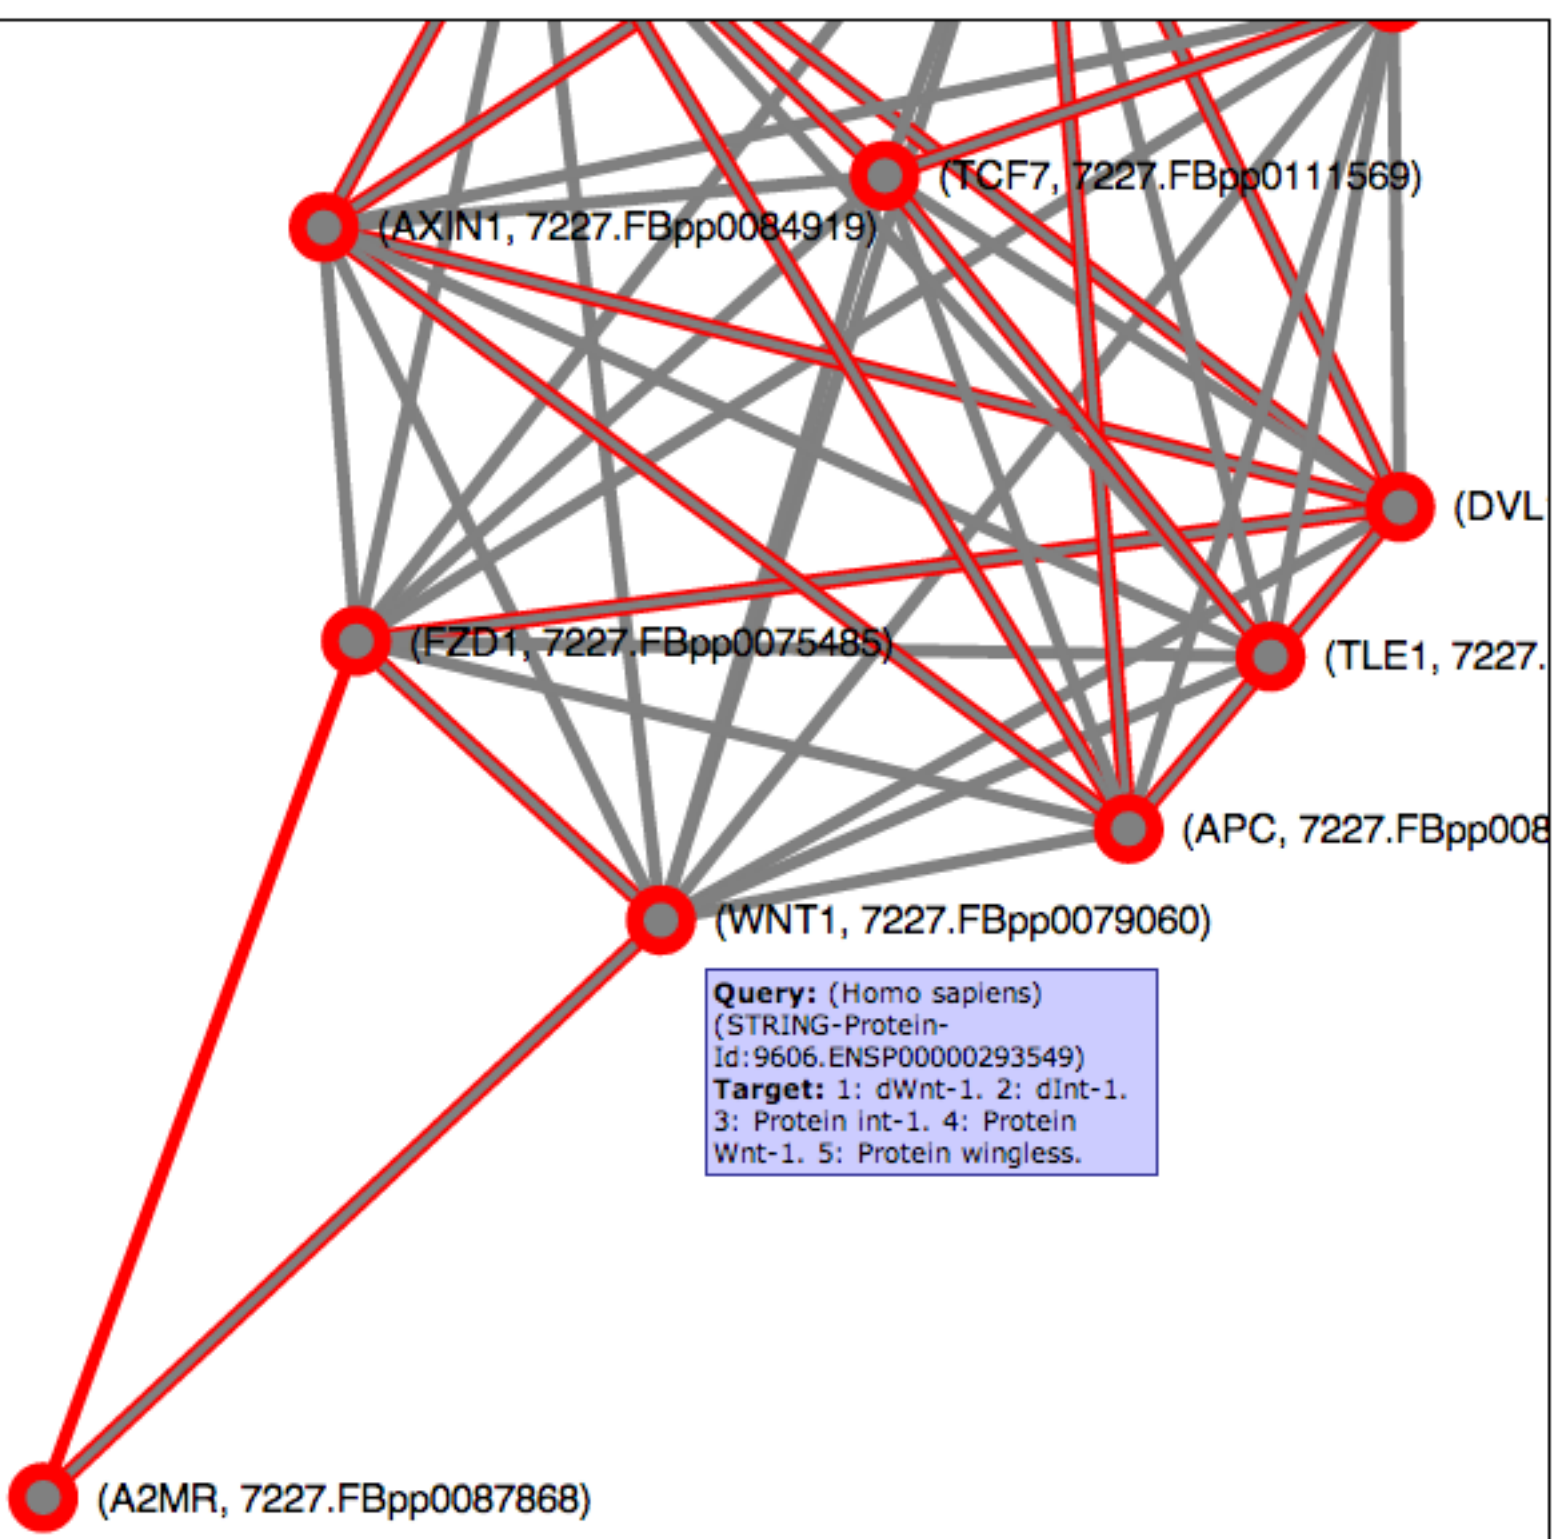

Export SVG

- Show node labels
- Show unmatched query nodes/edges
- Show background target nodes/edges
- Show unmatched target edges
