# Supplementary material for: NatalieQ: A web server for protein-protein interaction network querying
Source: Springer Nature journal article supplement (doi:10.1186/1752-0509-8-40), 2014-01-01
Supplement: 12918_2013_1313_MOESM4_ESM.pdf [file 12918_2013_1313_MOESM4_ESM.pdf]

**Alignment**

| Query node | Target node                      | E-value | Bit score | Query description                                        | Target description                                                                                                                                                                                                                                                                                |
|------------|----------------------------------|---------|-----------|----------------------------------------------------------|---------------------------------------------------------------------------------------------------------------------------------------------------------------------------------------------------------------------------------------------------------------------------------------------------|
| WNT1       | <a href="#">7227.FBpp0079060</a> | 5e-92   | 286       | (Homo sapiens) (STRING-Protein-Id:9606.ENSPP00000293549) | 1: dWnt-1. 2: dlnt-1. 3: Protein int-1. 4: Protein Wnt-1. 5: Protein wingless.                                                                                                                                                                                                                    |
| A2MR       | <a href="#">7227.FBpp0087868</a> | 0       | 2724      | (Homo sapiens) (STRING-Protein-Id:9606.ENSPP00000243077) | 1: CG33087.                                                                                                                                                                                                                                                                                       |
| FZD1       | <a href="#">7227.FBpp0075485</a> | 5e-177  | 519       | (Homo sapiens) (STRING-Protein-Id:9606.ENSPP00000287934) | 1: dFz1. 2: Frizzled. 3: Frizzled-1.                                                                                                                                                                                                                                                              |
| DVL1       | <a href="#">7227.FBpp0073310</a> | 2e-143  | 435       | (Homo sapiens) (STRING-Protein-Id:9606.ENSPP00000368169) | 1: Dishevelled protein. 2: Dishevelled, isoform B. 3: Segment polarity protein dishevelled.                                                                                                                                                                                                       |
| AXIN1      | <a href="#">7227.FBpp0084919</a> | 7e-18   | 87.8      | (Homo sapiens) (STRING-Protein-Id:9606.ENSPP00000262320) | 1: Axin. 2: d-Axin. 3: AT13274p. 4: RH74443p. 5: LD38584p. 6: Axin, isoform B. 7: Axin, isoform D. 8: Axin, isoform C. 9: Axis inhibition protein.                                                                                                                                                |
| GSK3B      | <a href="#">7227.FBpp0070454</a> | 0       | 619       | (Homo sapiens) (STRING-Protein-Id:9606.ENSPP00000324806) | 1: SGG. 2: F105468p. 3: MIP03616p. 4: Shaggy, isoform J. 5: Shaggy, isoform I. 6: Shaggy, isoform M. 7: Shaggy, isoform C. 8: Shaggy, isoform E. 9: Shaggy, isoform L. 10: Shaggy, isoform K. 11: Shaggy, isoform F. 12: Shaggy, isoform H. 13: Protein kinase shaggy. 14: Protein zeste-white 3. |
| APC        | <a href="#">7227.FBpp0084720</a> | 7e-146  | 509       | (Homo sapiens) (STRING-Protein-Id:9606.ENSPP00000257430) | 1: APC-like. 2: Adenomatous polyposis coli.                                                                                                                                                                                                                                                       |
| CTNNB1     | <a href="#">7227.FBpp0089031</a> | 0       | 1059      | (Homo sapiens) (STRING-Protein-Id:9606.ENSPP00000344456) | 1: Armadillo protein. 2: Armadillo segment polarity protein.                                                                                                                                                                                                                                      |
| TCF7       | <a href="#">7227.FBpp0111569</a> | 2e-41   | 157       | (Homo sapiens) (STRING-Protein-Id:9606.ENSPP00000340347) | 1: dTCF. 2: HL03718p. 3: RE59509p. 4: RE55961p. 5: RT01139p. 6: Protein pangolin, isoform J. 7: Protein pangolin, isoforms A/H/I.                                                                                                                                                                 |
| TLE1       | <a href="#">7227.FBpp0089115</a> | 0       | 660       | (Homo sapiens) (STRING-Protein-Id:9606.ENSPP00000365682) | 1: Protein groucho. 2: Enhancer of split m9/10 protein.                                                                                                                                                                                                                                           |
| MYC        | <a href="#">7227.FBpp0070501</a> | 7e-10   | 60.5      | (Homo sapiens) (STRING-Protein-Id:9606.ENSPP00000367207) | 1: dMyc1. 2: Diminutive. 3: Myc protein. 4: Diminutive protein.                                                                                                                                                                                                                                   |

**Conserved interactions**

| Query node | Query node | Target node                      | Target node                      | Target confidence |
|------------|------------|----------------------------------|----------------------------------|-------------------|
| WNT1       | A2MR       | <a href="#">7227.FBpp0079060</a> | <a href="#">7227.FBpp0087868</a> | 0.174             |
| WNT1       | FZD1       | <a href="#">7227.FBpp0079060</a> | <a href="#">7227.FBpp0075485</a> | 0.999             |
| FZD1       | DVL1       | <a href="#">7227.FBpp0075485</a> | <a href="#">7227.FBpp0073310</a> | 0.999             |
| DVL1       | AXIN1      | <a href="#">7227.FBpp0073310</a> | <a href="#">7227.FBpp0084919</a> | 0.997             |
| DVL1       | GSK3B      | <a href="#">7227.FBpp0073310</a> | <a href="#">7227.FBpp0070454</a> | 0.929             |
| DVL1       | APC        | <a href="#">7227.FBpp0073310</a> | <a href="#">7227.FBpp0084720</a> | 0.938             |
| DVL1       | CTNNB1     | <a href="#">7227.FBpp0073310</a> | <a href="#">7227.FBpp0089031</a> | 0.953             |
| AXIN1      | GSK3B      | <a href="#">7227.FBpp0084919</a> | <a href="#">7227.FBpp0070454</a> | 0.999             |
| AXIN1      | APC        | <a href="#">7227.FBpp0084919</a> | <a href="#">7227.FBpp0084720</a> | 0.996             |
| AXIN1      | CTNNB1     | <a href="#">7227.FBpp0084919</a> | <a href="#">7227.FBpp0089031</a> | 0.997             |
| GSK3B      | APC        | <a href="#">7227.FBpp0070454</a> | <a href="#">7227.FBpp0084720</a> | 0.991             |
| GSK3B      | CTNNB1     | <a href="#">7227.FBpp0070454</a> | <a href="#">7227.FBpp0089031</a> | 0.999             |
| APC        | CTNNB1     | <a href="#">7227.FBpp0084720</a> | <a href="#">7227.FBpp0089031</a> | 0.99              |
| CTNNB1     | TCF7       | <a href="#">7227.FBpp0089031</a> | <a href="#">7227.FBpp0111569</a> | 0.999             |
| TCF7       | TLE1       | <a href="#">7227.FBpp0111569</a> | <a href="#">7227.FBpp0089115</a> | 0.998             |
| TCF7       | MYC        | <a href="#">7227.FBpp0111569</a> | <a href="#">7227.FBpp0070501</a> | 0.791             |

**Interactions in query network but not in target network**

| Query node | Query node | Target node                      | Target node                      |
|------------|------------|----------------------------------|----------------------------------|
| A2MR       | FZD1       | <a href="#">7227.FBpp0087868</a> | <a href="#">7227.FBpp0075485</a> |

**Interactions in target network but not in query network**

| Target node                      | Target node                      | Target confidence | Query node | Query node |
|----------------------------------|----------------------------------|-------------------|------------|------------|
| <a href="#">7227.FBpp0079060</a> | <a href="#">7227.FBpp0073310</a> | 0.999             | WNT1       | DVL1       |
| <a href="#">7227.FBpp0079060</a> | <a href="#">7227.FBpp0084919</a> | 0.993             | WNT1       | AXIN1      |
| <a href="#">7227.FBpp0079060</a> | <a href="#">7227.FBpp0070454</a> | 0.998             | WNT1       | GSK3B      |
| <a href="#">7227.FBpp0079060</a> | <a href="#">7227.FBpp0084720</a> | 0.742             | WNT1       | APC        |
| <a href="#">7227.FBpp0079060</a> | <a href="#">7227.FBpp0089031</a> | 0.999             | WNT1       | CTNNB1     |
| <a href="#">7227.FBpp0079060</a> | <a href="#">7227.FBpp0111569</a> | 0.999             | WNT1       | TCF7       |
| <a href="#">7227.FBpp0079060</a> | <a href="#">7227.FBpp0089115</a> | 0.299             | WNT1       | TLE1       |
| <a href="#">7227.FBpp0079060</a> | <a href="#">7227.FBpp0070501</a> | 0.842             | WNT1       | MYC        |
| <a href="#">7227.FBpp0075485</a> | <a href="#">7227.FBpp0084919</a> | 0.936             | FZD1       | AXIN1      |
| <a href="#">7227.FBpp0075485</a> | <a href="#">7227.FBpp0070454</a> | 0.989             | FZD1       | GSK3B      |
| <a href="#">7227.FBpp0075485</a> | <a href="#">7227.FBpp0084720</a> | 0.723             | FZD1       | APC        |
| <a href="#">7227.FBpp0075485</a> | <a href="#">7227.FBpp0089031</a> | 0.974             | FZD1       | CTNNB1     |
| <a href="#">7227.FBpp0075485</a> | <a href="#">7227.FBpp0111569</a> | 0.877             | FZD1       | TCF7       |
| <a href="#">7227.FBpp0075485</a> | <a href="#">7227.FBpp0089115</a> | 0.276             | FZD1       | TLE1       |
| <a href="#">7227.FBpp0075485</a> | <a href="#">7227.FBpp0070501</a> | 0.346             | FZD1       | MYC        |
| <a href="#">7227.FBpp0073310</a> | <a href="#">7227.FBpp0111569</a> | 0.854             | DVL1       | TCF7       |
| <a href="#">7227.FBpp0073310</a> | <a href="#">7227.FBpp0070501</a> | 0.605             | DVL1       | MYC        |
| <a href="#">7227.FBpp0084919</a> | <a href="#">7227.FBpp0111569</a> | 0.989             | AXIN1      | TCF7       |
| <a href="#">7227.FBpp0084919</a> | <a href="#">7227.FBpp0089115</a> | 0.201             | AXIN1      | TLE1       |
| <a href="#">7227.FBpp0084919</a> | <a href="#">7227.FBpp0070501</a> | 0.835             | AXIN1      | MYC        |
| <a href="#">7227.FBpp0070454</a> | <a href="#">7227.FBpp0111569</a> | 0.962             | GSK3B      | TCF7       |
| <a href="#">7227.FBpp0070454</a> | <a href="#">7227.FBpp0089115</a> | 0.152             | GSK3B      | TLE1       |
| <a href="#">7227.FBpp0070454</a> | <a href="#">7227.FBpp0070501</a> | 0.953             | GSK3B      | MYC        |
| <a href="#">7227.FBpp0084720</a> | <a href="#">7227.FBpp0111569</a> | 0.933             | APC        | TCF7       |
| <a href="#">7227.FBpp0084720</a> | <a href="#">7227.FBpp0070501</a> | 0.486             | APC        | MYC        |
| <a href="#">7227.FBpp0089031</a> | <a href="#">7227.FBpp0089115</a> | 0.928             | CTNNB1     | TLE1       |
| <a href="#">7227.FBpp0089031</a> | <a href="#">7227.FBpp0070501</a> | 0.639             | CTNNB1     | MYC        |
| <a href="#">7227.FBpp0089115</a> | <a href="#">7227.FBpp0070501</a> | 0.887             | TLE1       | MYC        |
